# Supplementary material for: Proteomics and Organoid Culture Reveal the Underlying Pathogenesis of Hashimoto’s Thyroiditis
Source: PubMed Central journal article supplement (PMC8674930; doi:10.3389/fimmu.2021.784975), 2021-12-02
Supplement: DataSheet_1.pdf [file DataSheet_1.pdf]

Supplementary table. Primer list.

| Primer      | Sequence                     |
|-------------|------------------------------|
| H_PTMA_F    | TCAGACGCAGCCGTAGACA          |
| H_PTMA_R    | GCATTCCCGTTAGCAGGGG          |
| H_HSPD1_F   | CTACTGTACTGGCACGCTCTA        |
| H_HSPD1_R   | CAACAGCTAACATCACACCTCTC      |
| H_CS_F      | TGCTTCCTCCACGAATTTGAAA       |
| H_CS_R      | CCACCATACATCATGTCCACAG       |
| H_HNRNPC_F  | TGGGCTGCTCTGTTTCATAAGGG      |
| H_HNRNPC_R  | CTCGGTTCACTTTTGGCTCTGC       |
| H_PDIA4_F   | GGCAGGCTGTAGACTACGAG         |
| H_PDIA4_R   | TTGGTCAACACAAGCGTGACT        |
| H_ANXA6_F   | AGAGCTACAAGTCCCTCTACG        |
| H_ANXA6_R   | CCCACAATCAACCGTTCAAAC        |
| H_APOA1_F   | CCCTGGGATCGAGTGAAGGA         |
| H_APOA1_R   | CTGGGACACATAGTCTCTGCC        |
| H_CALR_F    | AGTTCCGGCAAGTTCTACGG         |
| H_CALR_R    | ACAGAGCATAAAAGCGTGCAT        |
| H_CAP1_F    | GGGGAGACGTGCAGAAACAT         |
| H_CAP1_R    | GGGTGCCAACAATCGGAAAG         |
| H_METTL7A_F | CAGAGTGCTGAGACCGGGA          |
| H_METTL7A_R | CTGGTCAGGTTGCACCCATC         |
| H_ENO1_F    | GCCGTGAACGAGAAGTCCTG         |
| H_ENO1_R    | ACGCCTGAAGAGACTCGGT          |
| H_UBE2O_F   | ACTAGAGGACCGTTCTGTGGT        |
| H_UBE2O_R   | TGACGGGATAGATGATGCAGTT       |
| H_PFKL_F    | GTACCTGGCGCTGGTATCTG         |
| H_PFKL_R    | CCTCTCACACATGAAGTTCTCC       |
| H_DTYMK_F   | CCGTTCCCGGAAAGATCAAC         |
| H_DTYMK_R   | TCCCAGCGATTTGCAGAAAAA        |
| H_IDE_F     | TTTTCAGCCCATTTGCTTATGTG      |
| H_IDE_R     | TGCATACTCGTTGAGTGAGTCTT      |
| H_GSR_F     | TGATCCCAAGCCCACAATAGAGGTCAGT |
| H_GSR_R     | CCATCGCTGGTTATTCCTAAGCTGGCAC |
| H_RPIA_F    | AGTGCTGGGAATTGGAAGTGG        |
| H_RPIA_R    | GGGAATACAGACGAGGTTTCAGA      |
| H_ENSA_F    | AGGCAAAGCTAAAGGCCAAAT        |
| H_ENSA_R    | GCCATGTTGTAGTCTCCTGAGT       |
| H_HSPB1_F   | ACGGTCAAGACCAAGGATGG         |
| H_HSPB1_R   | AGCGTGTATTTCCGCGTGA          |
| H_PLIN3_F   | TTGCATCAGCCAGCGAATACGC       |
| H_PLIN3_R   | CACCTTAGACGACACAAGCTCC       |
| H_CXCL8_F   | CACTGCGCCAACACAGAAAT         |
| H_CXCL8_R   | GCCCTCTTCAAAAATTCTCCAC       |

---

|           |                        |
|-----------|------------------------|
| H_CCL21_F | AGCAGGAACCAAGCTTAGGCTG |
| H_CCL21_R | GGTGTCTTGTCCAGATGCTGCA |
| H_CCL2_F  | CCCAAAGAAGCTGTGATCTTCA |
| H_CCL2_R  | TCTGGGGAAAGCTAGGGGAA   |
| H_CCL3_F  | TGCAACCAGTTCTCTGCATC   |
| H_CCL3_R  | TGGCTGCTCGTCTCAAAGTA   |

---
